# Supplementary material for: High-throughput screening of genetic and cellular drivers of syncytium formation induced by the spike protein of SARS-CoV-2
Source: PubMed Central journal article supplement (PMC10963270; doi:10.1038/s41551-023-01140-z), 2023-11-23
Supplement: 41551_2023_1140_MOESM1_ESM.pdf [file 41551_2023_1140_MOESM1_ESM.pdf]

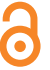

---

# High-throughput screening of genetic and cellular drivers of syncytium formation induced by the spike protein of SARS-CoV-2

---

In the format provided by the authors and unedited

---

## Contents

|                              |                                                                                                                                        |
|------------------------------|----------------------------------------------------------------------------------------------------------------------------------------|
| <b>Supplementary Fig. 1</b>  | Library design and quality assessment for the Spike deep mutational scans                                                              |
| <b>Supplementary Fig. 2</b>  | Mutability scores of all single mutations of the FPPR and furin cleavage site region of SARS-CoV-2 Spike                               |
| <b>Supplementary Fig. 3</b>  | Assay ranges in defining fusion-(in)competent variants using droplet microfluidics-based and size-exclusion selection-based strategies |
| <b>Supplementary Fig. 4</b>  | Testing a reverse selection approach to collect fusion-resistant cells                                                                 |
| <b>Supplementary Fig. 5</b>  | RNA-seq and gene ontology enrichment analysis on <i>AP2M1</i> and <i>FCHO2</i> knockout A549-ACE2-Cas9 cells                           |
| <b>Supplementary Fig. 6</b>  | Cell viability after treatment with endocytosis inhibitors                                                                             |
| <b>Supplementary Fig. 7</b>  | CME inhibition does not affect Spike and ACE2 surface expressions and ACE2 binding                                                     |
| <b>Supplementary Fig. 8</b>  | Clathrin-mediated endocytosis inhibition reduces SARS-CoV-2 virus RdRp level and Spike-pseudotyped virus susceptibility                |
| <b>Supplementary Fig. 9</b>  | Clathrin-mediated endocytosis inhibitors impede SARS-CoV-2 live virus-induced pathological damages in hamster lung tissues             |
| <b>Supplementary Table 1</b> | Constructs used in this study                                                                                                          |
| <b>Supplementary Table 2</b> | Primers used in this study                                                                                                             |



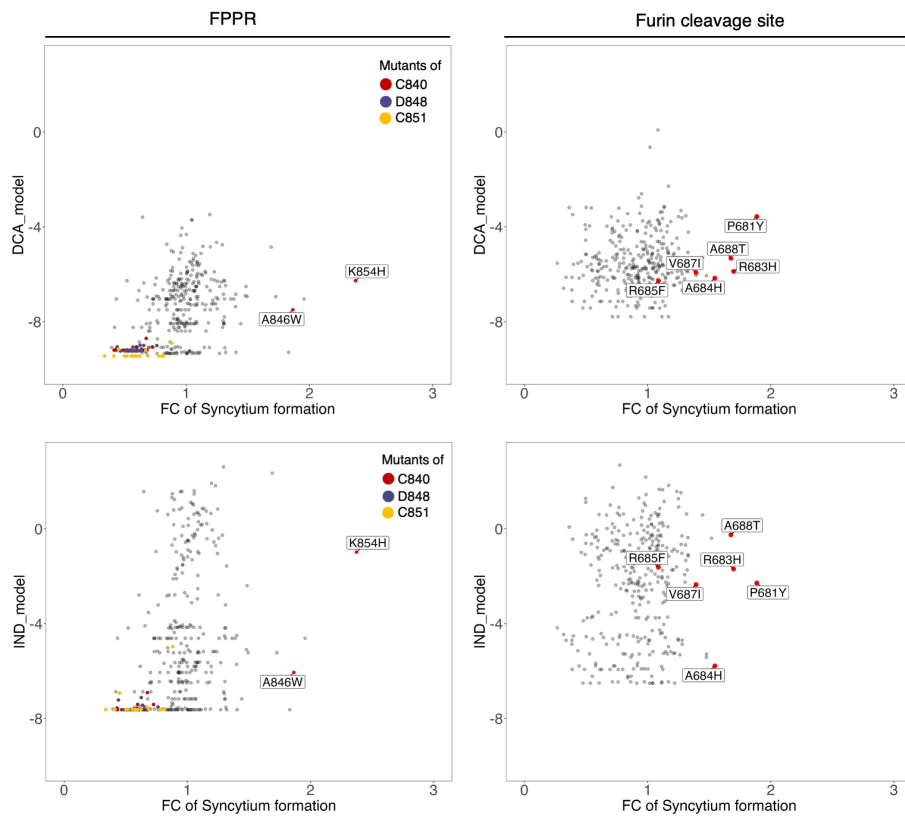

**Supplementary Fig. 2 | Mutability scores of all single mutations of the FPPR and furin cleavage site region of SARS-CoV-2 Spike.** The DCA and IND scores are plotted against the Fold Change (FC) obtained from the Spike DMS library profiling for each mutant. Mutants validated in this study are highlighted and labelled.

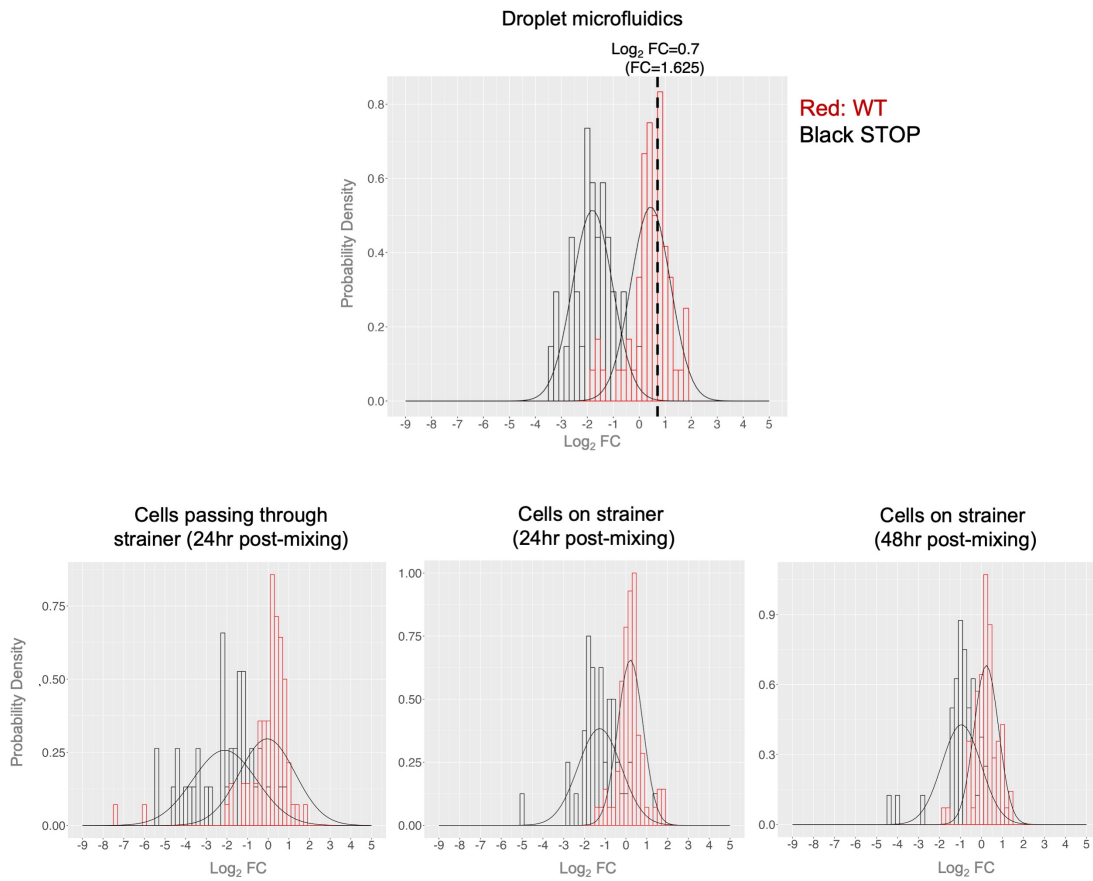

**Supplementary Fig. 3 | Assay ranges in defining fusion-(in)competent variants using droplet microfluidics-based and size-exclusion selection-based strategies.** Histograms showing the distribution of syncytium-forming potentials (measured by  $\log_2$  Fold Change (FC)) of the WT Spike variants with synonymous codons and those with stop codons, assayed via the droplet microfluidics-based system and the size exclusion-based systems.

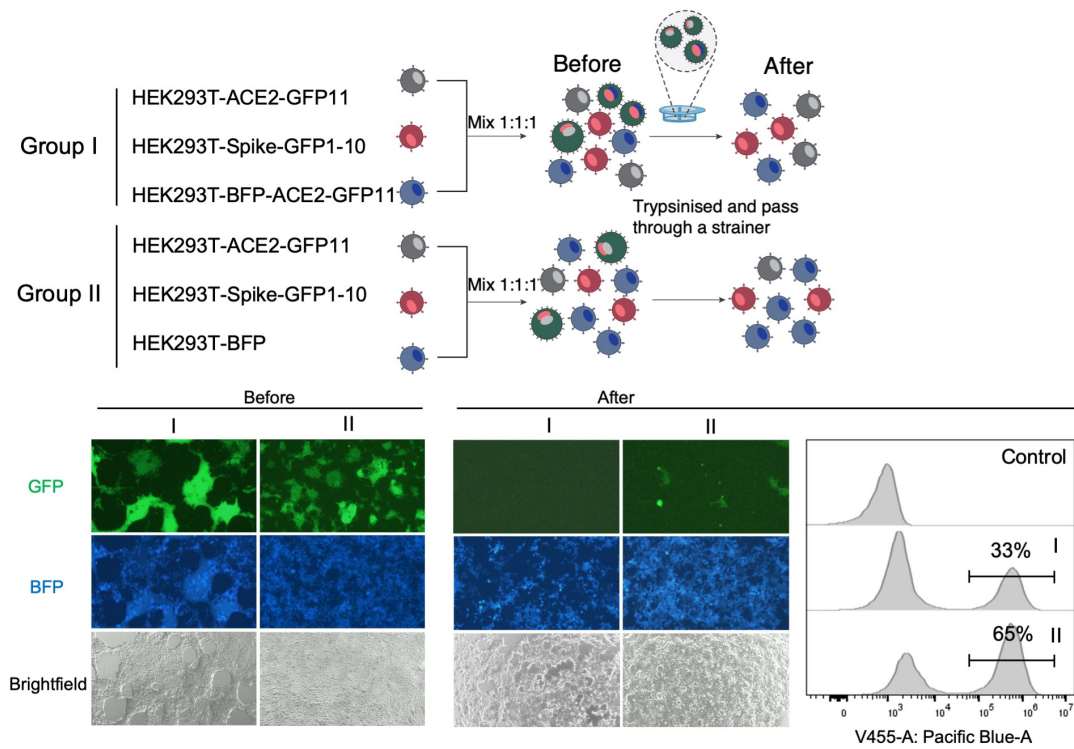

**Supplementary Fig. 4 | Testing a reverse selection approach to collect fusion-resistant cells.**

HEK293T cells expressing ACE2-GFP11 and HEK293T cells expressing Spike-GFP1-10 were mixed with either HEK293T expressing BFP-ACE2-GFP11 or HEK293T expressing BFP only in 1:1:1 ratio. The cocultured cells were trypsinized and passed through a 40 $\mu$ m cell strainer to remove the fused cells. Cells were imaged before and after passing through the strainer, and representative images are shown. The percentage of BFP<sup>+</sup> cells was measured by FACS.

a

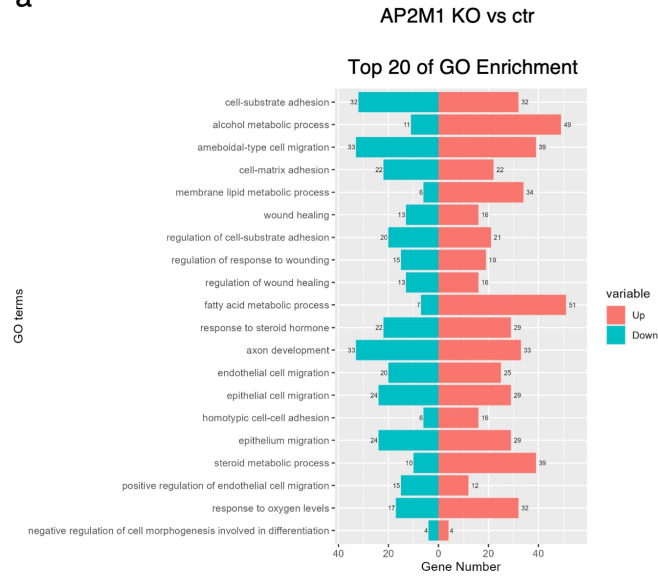

b

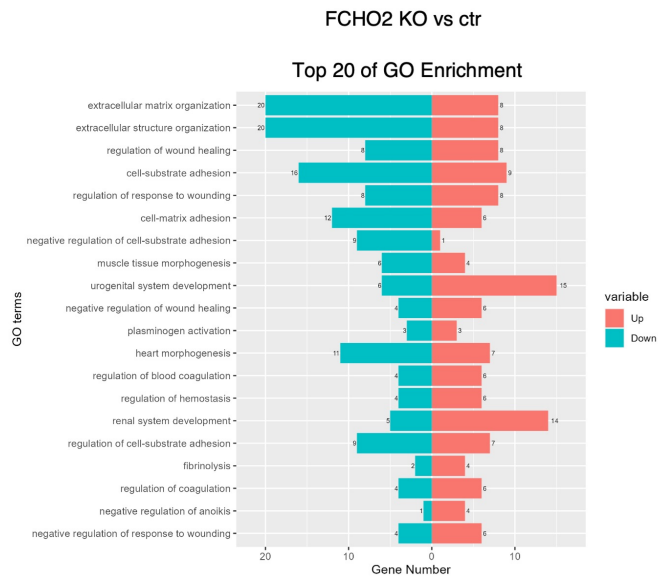

**Supplementary Fig. 5 | RNA-seq and gene ontology enrichment analysis on *AP2M1* and *FCHO2* knockout A549-ACE2-Cas9 cells. a-b.** Genes that are differentially expressed in *AP2M1* (a) and *FCHO2* (b) knockout (KO) cells when compared with control (ctr) cells were identified by RNA-seq analysis. Data were collected from three biological replicates. The up- and down-regulated genes were subjected to gene ontology (GO) enrichment analysis. The top 20 hits of biological processes in the GO enrichment analysis are shown.

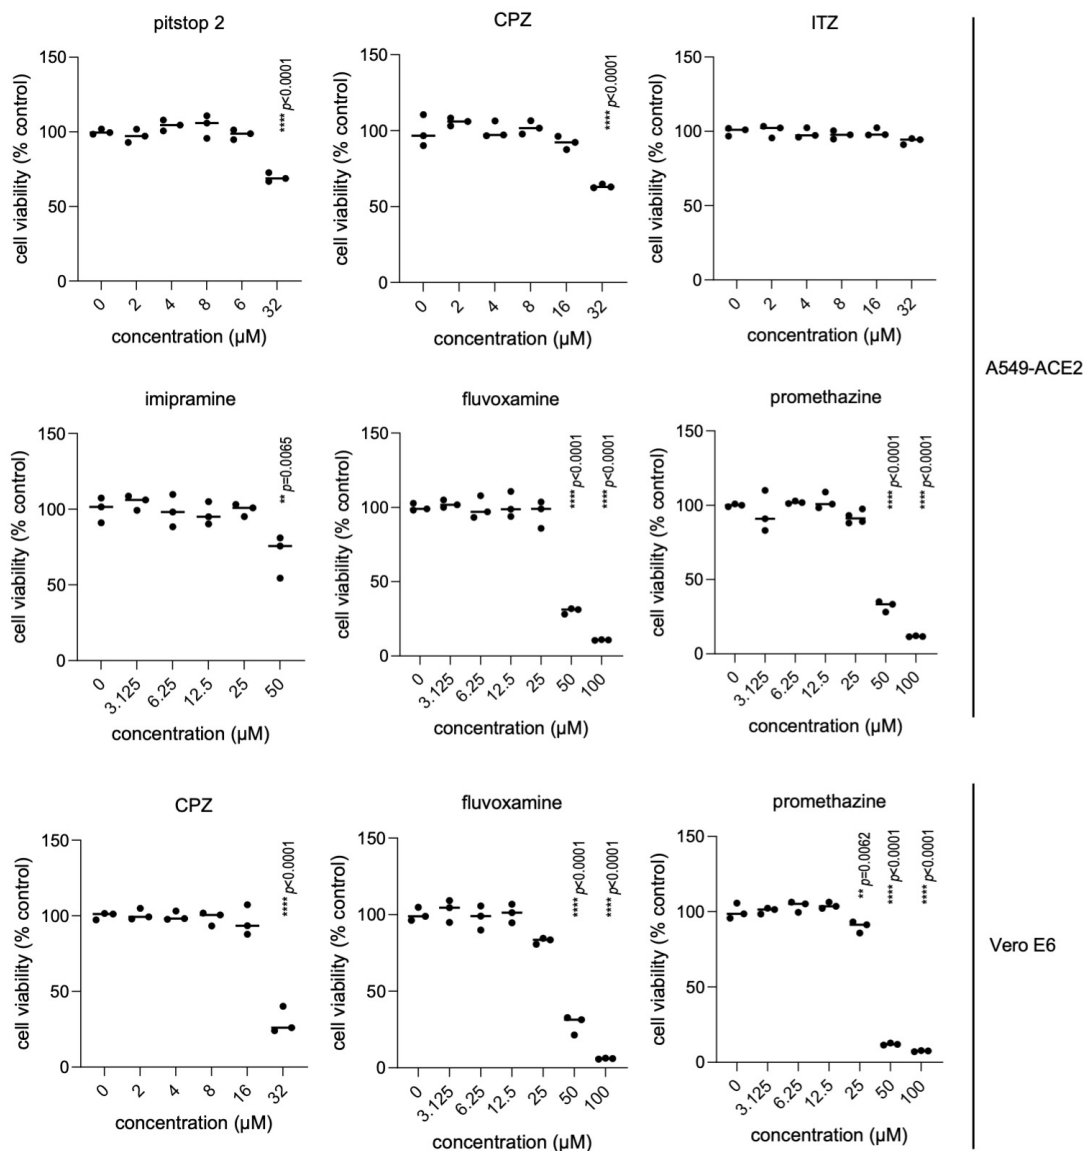

**Supplementary Fig. 6 | Cell viability after treatment with endocytosis inhibitors.** Viability of the drug-treated A549-ACE2 and Vero E6 cells was determined by XTT assay and is normalized to the DMSO-treated control. P-values indicated were compared with DMSO treated control. Statistical significance was determined using one-way ANOVA.



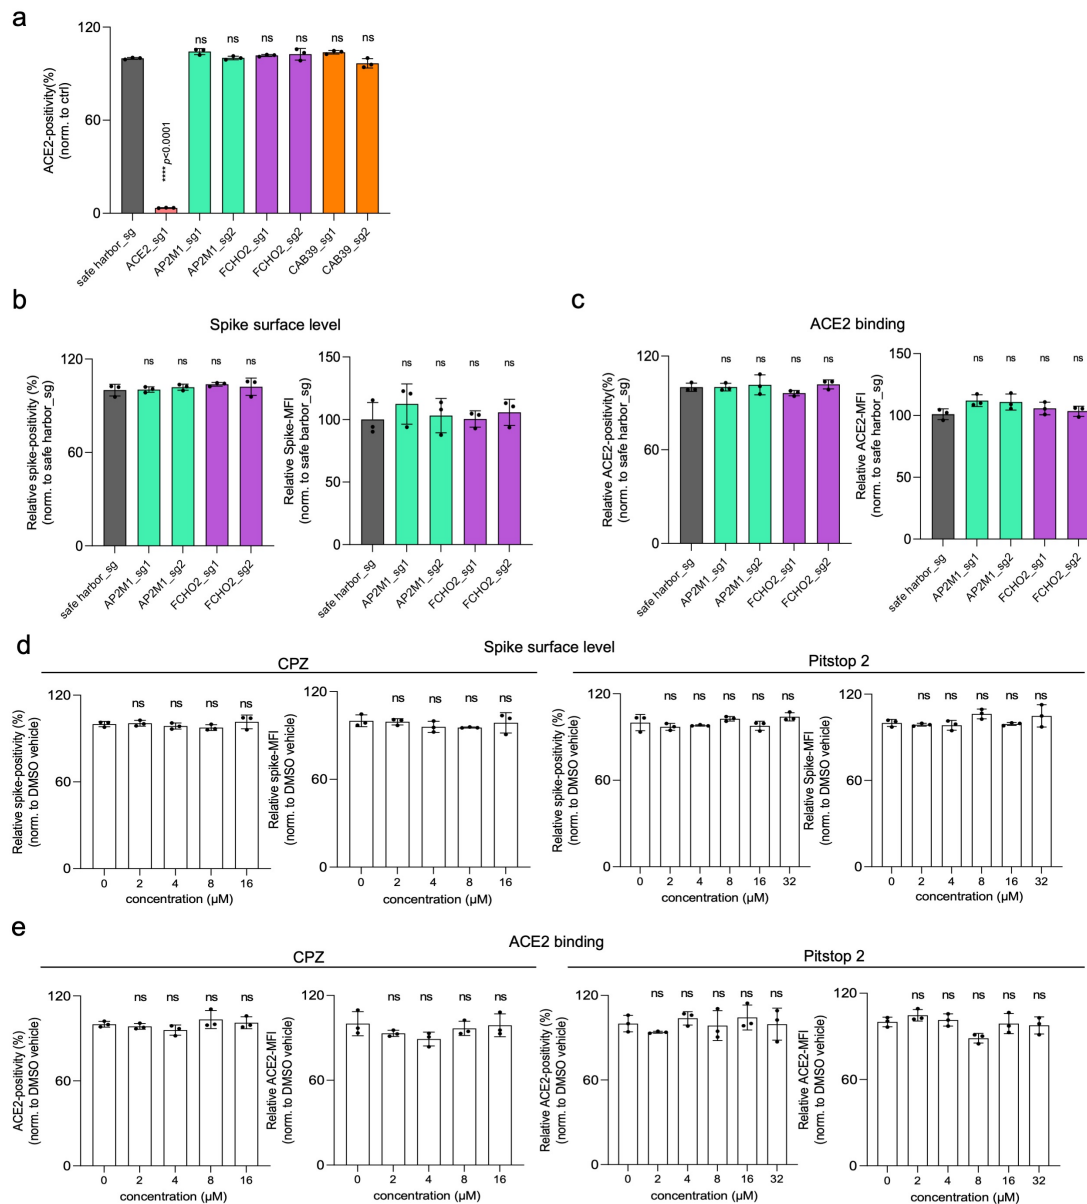

**Supplementary Fig. 7 | CME inhibition does not affect Spike and ACE2 surface expressions and ACE2 binding.** **a**, ACE2 surface expression in gene knockout A549-ACE2 cells. ACE2 surface staining was performed on the sgRNA-infected A549-ACE2-Cas9-BFP cells at 10 days post-infection, and the percentage of ACE2 positivity is normalized to that in the control cells infected with safe harbor-targeting sgRNA. **b-c**, Spike surface expression (b) and ACE2 binding (c) of *AP2M1* and *FCHO2* knockout HEK293T sender cells. **d-e**, Spike surface expression and ACE2 binding of drug-treated HEK293T sender cells, and the percentages of Spike and ACE2 positivity are normalized to that in the DMSO-treated control. Data shown are mean  $\pm$  SD ( $n = 3$ ), P-values indicated were compared with the safe harbor sgRNA controls (a-c) or DMSO treated control (d-e). ns represents no significant difference. Statistical significance was determined using one-way ANOVA.

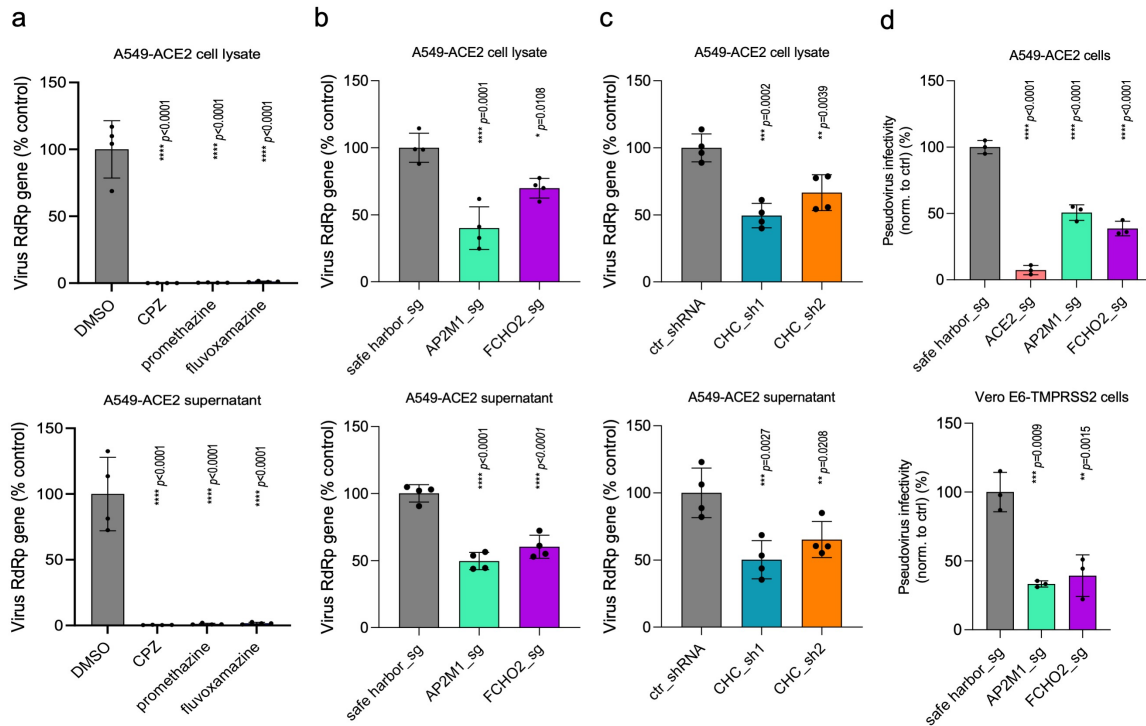

**Supplementary Fig. 8 | Clathrin-mediated endocytosis inhibition reduces SARS-CoV-2 virus RdRp level and Spike-pseudotyped virus susceptibility.** **a-c**, qRT-PCR measurements of SARS-CoV-2 RdRp levels in CME inhibitor-treated (a), *AP2M1* and *FCHO2* knockout (b), and *CHC* knockdown (c) A549-ACE2 cells. A549-ACE2-Cas9 cells were used in (b). The RdRp levels in both cell lysate and supernatant after SARS-CoV-2 D614G virus infection were measured. **d**, Spike-pseudotyped virus susceptibility test of *AP2M1* and *FCHO2* knockout A549-ACE2 and Vero E6-TMPRSS2 cells. The pseudovirus infectivity was determined by measuring the GFP<sup>+</sup> cells within the sgRNA-containing (BFP<sup>+</sup>) A549-ACE2-Cas9 and Vero E6-TMPRSS2-Cas9 cell populations. Data shown are mean  $\pm$  SD ( $n = 4$  for (a-c);  $n = 3$  for (d)). P-values indicated were compared with DMSO-treated control (a), safe harbour-targeting sgRNA (b, d), or control (ctr) shRNA (c). Statistical significance was determined using one-way ANOVA.

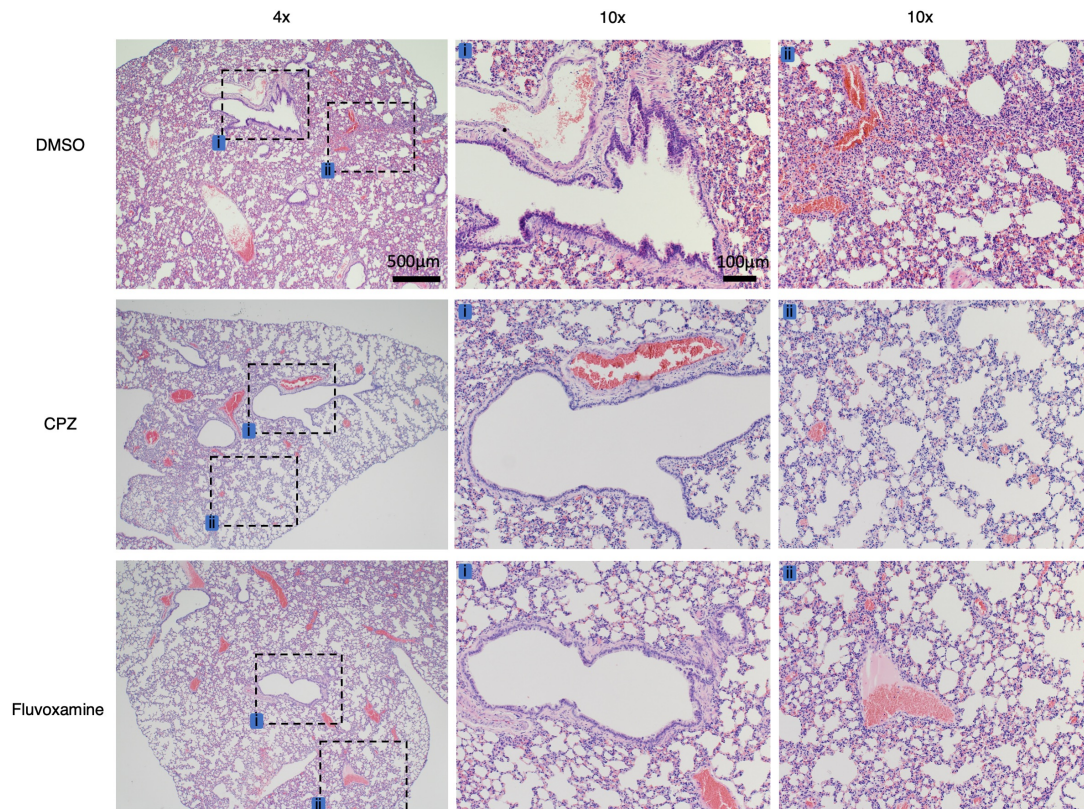

**Supplementary Fig. 9 | Clathrin-mediated endocytosis inhibitors impede SARS-CoV-2 live virus-induced pathological damages in hamster lung tissues.** Haematoxylin and eosin staining was used to examine the pathological damages of lung tissues after SARS-CoV-2 infection. The bronchiole epithelium region (i) and alveolar space region (ii) were highlighted in the images. In the DMSO-treated hamsters, extensive bronchiolar epithelium damages including bronchiolar epithelial desquamation and intense peribronchiolar mononuclear cell infiltration were detected. Alveolar congestion, haemorrhage and infiltration were observed in the alveolar region. CPZ and Fluvoxamine treatment alleviated the virus-induced pathological damages in regions of bronchiolar epithelium and alveolar space, including milder infiltration and alveolar haemorrhage.

**Supplementary Table 1 | Constructs used in this study.**

| Constructs used in this study |                                                  |                  |
|-------------------------------|--------------------------------------------------|------------------|
| <b>construct ID</b>           | <b>Design</b>                                    | <b>Reference</b> |
| CHp178                        | pFUGW-CAGp-Spike(D614G)-GFP11-P2A-mCherry        | this study       |
| CHp229                        | pFUGW-CAGp-Spike(omicron)-GFP11-P2A-mCherry      | this study       |
| pBW93                         | pFUGW-CMVp-BSD-P2A-GFP1-10                       | this study       |
| S_Q836V                       | pFUGW-CAGp-Spike(D614G, Q836V)-GFP11-P2A-mCherry | this study       |
| S_Y837D                       | pFUGW-CAGp-Spike(D614G, Y837D)-GFP11-P2A-mCherry | this study       |
| S_Y837F                       | pFUGW-CAGp-Spike(D614G, Y837F)-GFP11-P2A-mCherry | this study       |
| S_Y837K                       | pFUGW-CAGp-Spike(D614G, Y837K)-GFP11-P2A-mCherry | this study       |
| S_G838K                       | pFUGW-CAGp-Spike(D614G, G838K)-GFP11-P2A-mCherry | this study       |
| S_G838R                       | pFUGW-CAGp-Spike(D614G, G838R)-GFP11-P2A-mCherry | this study       |
| S_G838P                       | pFUGW-CAGp-Spike(D614G, G838P)-GFP11-P2A-mCherry | this study       |
| S_D839Q                       | pFUGW-CAGp-Spike(D614G, D839Q)-GFP11-P2A-mCherry | this study       |
| S_C840G                       | pFUGW-CAGp-Spike(D614G, C840G)-GFP11-P2A-mCherry | this study       |
| S_L841H                       | pFUGW-CAGp-Spike(D614G, L841H)-GFP11-P2A-mCherry | this study       |
| S_L841W                       | pFUGW-CAGp-Spike(D614G, L841W)-GFP11-P2A-mCherry | this study       |
| S_D843G                       | pFUGW-CAGp-Spike(D614G, D843G)-GFP11-P2A-mCherry | this study       |
| S_D843M                       | pFUGW-CAGp-Spike(D614G, D843M)-GFP11-P2A-mCherry | this study       |
| S_D843Y                       | pFUGW-CAGp-Spike(D614G, D843Y)-GFP11-P2A-mCherry | this study       |
| S_I844D                       | pFUGW-CAGp-Spike(D614G, I844D)-GFP11-P2A-mCherry | this study       |
| S_I844M                       | pFUGW-CAGp-Spike(D614G, I844M)-GFP11-P2A-mCherry | this study       |
| S_A845N                       | pFUGW-CAGp-Spike(D614G, A845N)-GFP11-P2A-mCherry | this study       |
| S_A845T                       | pFUGW-CAGp-Spike(D614G, A845T)-GFP11-P2A-mCherry | this study       |
| S_D843G                       | pFUGW-CAGp-Spike(D614G, D843G)-GFP11-P2A-mCherry | this study       |
| S_D848H                       | pFUGW-CAGp-Spike(D614G, D848H)-GFP11-P2A-mCherry | this study       |
| S_D848R                       | pFUGW-CAGp-Spike(D614G, D848R)-GFP11-P2A-mCherry | this study       |
| S_D848T                       | pFUGW-CAGp-Spike(D614G, D848T)-GFP11-P2A-mCherry | this study       |
| S_L849N                       | pFUGW-CAGp-Spike(D614G, L849N)-GFP11-P2A-mCherry | this study       |
| S_I850H                       | pFUGW-CAGp-Spike(D614G, I850H)-GFP11-P2A-mCherry | this study       |
| S_I850M                       | pFUGW-CAGp-Spike(D614G, I850M)-GFP11-P2A-mCherry | this study       |
| S_A852M                       | pFUGW-CAGp-Spike(D614G, A852M)-GFP11-P2A-mCherry | this study       |
| S_Q853R                       | pFUGW-CAGp-Spike(D614G, Q853R)-GFP11-P2A-mCherry | this study       |

|          |                                                    |                                               |
|----------|----------------------------------------------------|-----------------------------------------------|
| S_Q853V  | pFUGW-CAGp-Spike(D614G,Q853V)-GFP11-P2A-mCherry    | this study                                    |
| S_K854C  | pFUGW-CAGp-Spike(D614G, K854C)-GFP11-P2A-mCherry   | this study                                    |
| S_K854L  | pFUGW-CAGp-Spike(D614G, K854L)-GFP11-P2A-mCherry   | this study                                    |
| S_K854N  | pFUGW-CAGp-Spike(D614G, K854N)-GFP11-P2A-mCherry   | this study                                    |
| S_K854Q  | pFUGW-CAGp-Spike(D614G, K854Q)-GFP11-P2A-mCherry   | this study                                    |
| S_K854R  | pFUGW-CAGp-Spike(D614G, K854R)-GFP11-P2A-mCherry   | this study                                    |
| S_K854T  | pFUGW-CAGp-Spike(D614G, K854T)-GFP11-P2A-mCherry   | this study                                    |
| S_K854W  | pFUGW-CAGp-Spike(D614G, K854W)-GFP11-P2A-mCherry   | this study                                    |
| S_K854H  | pFUGW-CAGp-Spike(D614G, K854H)-GFP11-P2A-mCherry   | this study                                    |
| S_A846W  | pFUGW-CAGp-Spike(D614G, A846W)-GFP11-P2A-mCherry   | this study                                    |
| S_C840S  | pFUGW-CAGp-Spike(D614G, C840S)-GFP11-P2A-mCherry   | this study                                    |
| S_D848N  | pFUGW-CAGp-Spike(D614G, D848N)-GFP11-P2A-mCherry   | this study                                    |
| S_C851S  | pFUGW-CAGp-Spike(D614G, C851S)-GFP11-P2A-mCherry   | this study                                    |
| S_P681Y  | pFUGW-CAGp-Spike(D614G, P681Y)-GFP11-P2A-mCherry   | this study                                    |
| S_R683H  | pFUGW-CAGp-Spike(D614G, R683H)-GFP11-P2A-mCherry   | this study                                    |
| S_A684H  | pFUGW-CAGp-Spike(D614G, A684H)-GFP11-P2A-mCherry   | this study                                    |
| S_R685F  | pFUGW-CAGp-Spike(D614G, R685F)-GFP11-P2A-mCherry   | this study                                    |
| S_V687I  | pFUGW-CAGp-Spike(D614G, V687I)-GFP11-P2A-mCherry   | this study                                    |
| S_A688T  | pFUGW-CAGp-Spike(D614G, A688T)-GFP11-P2A-mCherry   | this study                                    |
| S_K1255F | pFUGW-CAGp-Spike(D614G, K1255F)-GFP11-P2A-mCherry  | this study                                    |
| O_K854H  | pFUGW-CAGp-Spike(omicron, K854H)-GFP11-P2A-mCherry | this study                                    |
| O_A846W  | pFUGW-CAGp-Spike(omicron, A846W)-GFP11-P2A-mCherry | this study                                    |
| O_C840S  | pFUGW-CAGp-Spike(omicron, C840S)-GFP11-P2A-mCherry | this study                                    |
| O_D848N  | pFUGW-CAGp-Spike(omicron,D848N)-GFP11-P2A-mCherry  | this study                                    |
| O_C851S  | pFUGW-CAGp-Spike(omicron, C851S)-GFP11-P2A-mCherry | this study                                    |
| hFurin   | pCMV3-huFurin                                      | Sino biological (Cat No. HG10141-ACR)         |
| hTMPRSS2 | pCMV3-huTMPRSS2                                    | Sino biological (Cat No. HG13070-CH)          |
| AWp30    | pFUGW-EFSp-Cas9-P2A-Zeo                            | Wong, A.S., et al., PNAS, 2016; 113(9):2544-9 |
| pBW69d   | pFUGW-hU6-ACE2_sg1-PGKp-puro-T2A-BFP               | this study                                    |
| pBW78d   | pFUGW-hU6-safe harbor_sg1-PGKp-puro-T2A-BFP        | this study                                    |
| pBW111   | pFUGW-hU6-ACE2_sg3-PGKp-puro-T2A-BFP               | this study                                    |
| pBW112   | pFUGW-hU6-CAB39_sg1-PGKp-puro-T2A-BFP              | this study                                    |
| pBW113   | pFUGW-hU6-CAB39_sg2-PGKp-puro-T2A-BFP              | this study                                    |
| pBW114   | pFUGW-hU6-AP2M1_sg1-PGKp-puro-T2A-BFP              | this study                                    |

|                |                                                          |                                                                            |
|----------------|----------------------------------------------------------|----------------------------------------------------------------------------|
| pBW115         | pFUGW-hU6-AP2M1_sg2-PGKp-puro-T2A-BFP                    | this study                                                                 |
| pBW116         | pFUGW-hU6-FCHO2_sg1-PGKp-puro-T2A-BFP                    | this study                                                                 |
| pBW117         | pFUGW-hU6-FCHO2_sg2-PGKp-puro-T2A-BFP                    | this study                                                                 |
| pBW128         | pFUGW-hU6-GBP6_sg1-PGKp-puro-T2A-BFP                     | this study                                                                 |
| pBW129         | pFUGW-hU6-GBP6_sg2-PGKp-puro-T2A-BFP                     | this study                                                                 |
| pBW130         | pFUGW-hU6-RNF2_sg1-PGKp-puro-T2A-BFP                     | this study                                                                 |
| pBW131         | pFUGW-hU6-RNF2_sg2-PGKp-puro-T2A-BFP                     | this study                                                                 |
| pBW134         | pFUGW-hU6-ZEB1_sg1-PGKp-puro-T2A-BFP                     | this study                                                                 |
| pBW135         | pFUGW-hU6-ZEB1_sg2-PGKp-puro-T2A-BFP                     | this study                                                                 |
| pBW136         | pFUGW-hU6-UBIAD1_sg1-PGKp-puro-T2A-BFP                   | this study                                                                 |
| pBW137         | pFUGW-hU6-UBIAD1_sg2-PGKp-puro-T2A-BFP                   | this study                                                                 |
| pBW138         | pFUGW-hU6-non targeting_sg1-PGKp-puro-T2A-BFP            | this study                                                                 |
| pBW139         | pFUGW-hU6-non targeting_sg2-PGKp-puro-T2A-BFP            | this study                                                                 |
| pBW145         | pFUGW-hU6-ACE2_sg-PGKp-puro-T2A-BFP (for vero E6 cells)  | this study                                                                 |
| pBW147         | pFUGW-hU6-FCHO2_sg-PGKp-puro-T2A-BFP (for vero E6 cells) | this study                                                                 |
| pBW168         | pFUGW-hU6-NDUFB10_sg1-PGKp-puro-T2A-BFP                  | this study                                                                 |
| pBW169         | pFUGW-hU6-NDUFB10_sg2-PGKp-puro-T2A-BFP                  | this study                                                                 |
| addgene 138152 | pFUGW-EF1 $\alpha$ -d2EGFP                               | Wessels, H.H., et al., Nat Biotechnol. 2020 Jun;38(6):722-727.             |
| addgene 179907 | pFUGW-CAGp-spike(omicron)                                | Garcia-Beltran, W.F., et al. Cell. 2022 Jan 6. pii: S0092-8674(21)01496-3. |
| addgene 10879  | pLKO.1-TRC contorl                                       | Moffat, J., et al.Cell, 2006. 124(6): p. 1283-98.                          |
| pBW164         | pFUGW-hU6-CHC_sh1-PGKp-puro                              | this study                                                                 |
| pBW165         | pFUGW-hU6-CHC_sh2-PGKp-puro                              | this study                                                                 |
| pBW166         | pFUGW-hU6-CHC_sh3-PGKp-puro                              | this study                                                                 |
| pBW167         | pFUGW-hU6-non targeting_sh-PGKp-puro                     | this study                                                                 |
| addgene 80409  | pHR-SFFV-GFP1-10                                         | Kamiyama, D. et al.Nat Commun 7, 11046 (2016).                             |
| pBW89          | pFUGW-CMVp-BSD-P2A-GFP11x7                               | this study                                                                 |

**Supplementary Table 2 | Primers used in this study.**

| List of primers and sgRNAs used |                                                                       |                                                                               |
|---------------------------------|-----------------------------------------------------------------------|-------------------------------------------------------------------------------|
| Primers                         |                                                                       |                                                                               |
| Name                            | Sequence                                                              | Description                                                                   |
| BW275-F                         | ACACTCTTTCCCTACACGACGCTCTTCCGATCTCTTGTGGAAGGACGAAACA                  | 1st step PCR primers for amplification of the sgRNA library                   |
| BW276-R                         | GTGACTGGAGTTCAGACGTGTGCTCTTCCGATCTCTAAAGCGCATGCTCCAGAC                |                                                                               |
| Nova_i5_1                       | AATGATACGGCGACCACCGAGATCTACACCGATTGCAACACTCTTTCCCTACACGACGCTCTTCCGATC | 2nd step PCR primers for addition of the illumina adapters and index sequence |
| Nova_i5_2                       | AATGATACGGCGACCACCGAGATCTACACGCAGAACAACTCTTTCCCTACACGACGCTCTTCCGATC   |                                                                               |
| Nova_i5_3                       | AATGATACGGCGACCACCGAGATCTACACGCCTTCTTACACTCTTTCCCTACACGACGCTCTTCCGATC |                                                                               |
| Nova_i5_4                       | AATGATACGGCGACCACCGAGATCTACACCGGAAGAAACTCTTTCCCTACACGACGCTCTTCCGATC   |                                                                               |
| Nova_i5_5                       | AATGATACGGCGACCACCGAGATCTACACCCAGAGAAACTCTTTCCCTACACGACGCTCTTCCGATC   |                                                                               |
| Nova_i5_6                       | AATGATACGGCGACCACCGAGATCTACACGAGGAGAAACTCTTTCCCTACACGACGCTCTTCCGATC   |                                                                               |
| Nova_i5_7                       | AATGATACGGCGACCACCGAGATCTACACCACCAGAAACTCTTTCCCTACACGACGCTCTTCCGATC   |                                                                               |
| Nova_i5_8                       | AATGATACGGCGACCACCGAGATCTACACACGAGGAAACTCTTTCCCTACACGACGCTCTTCCGATC   |                                                                               |
| Nova_i5_9                       | AATGATACGGCGACCACCGAGATCTACACGGTAGGAAACTCTTTCCCTACACGACGCTCTTCCGATC   |                                                                               |
| Nova_i5_10                      | AATGATACGGCGACCACCGAGATCTACACGAACGAAACTCTTTCCCTACACGACGCTCTTCCGATC    |                                                                               |
| Nova_i5_11                      | AATGATACGGCGACCACCGAGATCTACACTTGCGAAACTCTTTCCCTACACGACGCTCTTCCGATC    |                                                                               |
| Nova_i5_12                      | AATGATACGGCGACCACCGAGATCTACACCAGTGAAACTCTTTCCCTACACGACGCTCTTCCGATC    |                                                                               |
| Nova_i5_13                      | AATGATACGGCGACCACCGAGATCTACACTCCTGAAACTCTTTCCCTACACGACGCTCTTCCGATC    |                                                                               |
| Nova_i5_14                      | AATGATACGGCGACCACCGAGATCTACACTACGCGAAACTCTTTCCCTACACGACGCTCTTCCGATC   |                                                                               |
| Nova_i5_15                      | AATGATACGGCGACCACCGAGATCTACACAGACGAAACTCTTTCCCTACACGACGCTCTTCCGATC    |                                                                               |
| Nova_i5_16                      | AATGATACGGCGACCACCGAGATCTACACTGGTCGAAACTCTTTCCCTACACGACGCTCTTCCGATC   |                                                                               |
| Nova_i7_1                       | CAAGCAGAAGACGGCATACGAGATTTGGTGGAGTGACTGGAGTTCAGACGTGTGCTCTTCCGATC     |                                                                               |
| Nova_i7_2                       | CAAGCAGAAGACGGCATACGAGATTTGGCACTGTGACTGGAGTTCAGACGTGTGCTCTTCCGATC     |                                                                               |
| Nova_i7_3                       | CAAGCAGAAGACGGCATACGAGATTTGGATCCGTGACTGGAGTTCAGACGTGTGCTCTTCCGATC     |                                                                               |
| Nova_i7_4                       | CAAGCAGAAGACGGCATACGAGATTTGACGTCGTGACTGGAGTTCAGACGTGTGCTCTTCCGATC     |                                                                               |
| Nova_i7_5                       | CAAGCAGAAGACGGCATACGAGATTTGAGCTGGTACTGGAGTTCAGACGTGTGCTCTTCCGATC      |                                                                               |
| Nova_i7_6                       | CAAGCAGAAGACGGCATACGAGATTTGAGGCAGTGACTGGAGTTCAGACGTGTGCTCTTCCGATC     |                                                                               |
| Nova_i7_7                       | CAAGCAGAAGACGGCATACGAGATTTATCGGCCTGACTGGAGTTCAGACGTGTGCTCTTCCGATC     |                                                                               |
| Nova_i7_8                       | CAAGCAGAAGACGGCATACGAGATTTACGGAGGTGACTGGAGTTCAGACGTGTGCTCTTCCGATC     |                                                                               |
| Nova_i7_9                       | CAAGCAGAAGACGGCATACGAGATTTACAGCCGTGACTGGAGTTCAGACGTGTGCTCTTCCGATC     |                                                                               |
| Nova_i7_10                      | CAAGCAGAAGACGGCATACGAGATTTAGCCGAGTGACTGGAGTTCAGACGTGTGCTCTTCCGATC     |                                                                               |
| Nova_i7_11                      | CAAGCAGAAGACGGCATACGAGATTTCCAAGGTGACTGGAGTTCAGACGTGTGCTCTTCCGATC      |                                                                               |
| Nova_i7_12                      | CAAGCAGAAGACGGCATACGAGATTTCTGGATGTGACTGGAGTTCAGACGTGTGCTCTTCCGATC     |                                                                               |
| Nova_i7_13                      | CAAGCAGAAGACGGCATACGAGATTTCTGTGCAGTGACTGGAGTTCAGACGTGTGCTCTTCCGATC    |                                                                               |
| Nova_i7_14                      | CAAGCAGAAGACGGCATACGAGATTTGCCATGTGACTGGAGTTCAGACGTGTGCTCTTCCGATC      |                                                                               |
| Nova_i7_15                      | CAAGCAGAAGACGGCATACGAGATTTCTGGAACGTGACTGGAGTTCAGACGTGTGCTCTTCCGATC    |                                                                               |
| Nova_i7_16                      | CAAGCAGAAGACGGCATACGAGATTTCTGAGGTGTGACTGGAGTTCAGACGTGTGCTCTTCCGATC    |                                                                               |
| SA160                           | AATGATACGGCGACCACCGA                                                  |                                                                               |

|          |                                                                                              |                                                                           |
|----------|----------------------------------------------------------------------------------------------|---------------------------------------------------------------------------|
| SA161    | CAAGCAGAAGACGGCATACGA                                                                        | quantification of NGS library concentration                               |
| S_DMSfs1 | TTACCTCGTCTCTTGCTTCTTACCAGACCCAAACCAACTCTCCTAGGCGAGCCCGGTCCG TAGCA                           | universal forward primer for FPPR DMS library construction                |
| S_DMSrs  | TTACCTCGTCTCTTAAATTTTTGGGCGCATATCAGATCC                                                      | universal reverse primer for Furin cleavage site DMS library construction |
| S_DMS1   | TTCGTCTCTTGCTNNSTACCAGACCCAAACCAACTCTCCTAGGCGTGCCCGGTCCGTAG CCAGTCAAAGCATAATTGCGTACACCATGAG  | Furin cleavage site_NNS primer                                            |
| S_DMS2   | TTCGTCTCTTGCTTCTNNSCAGACCCAAACCAACTCTCCTAGGCGTGCCCGGTCCGTAGC CAGTCAAAGCATAATTGCGTACACCATGAG  |                                                                           |
| S_DMS3   | TTCGTCTCTTGCTTCTTACNNSACCCAAACCAACTCTCCTAGGCGTGCCCGGTCCGTAGC CAGTCAAAGCATAATTGCGTACACCATGAG  |                                                                           |
| S_DMS4   | TTCGTCTCTTGCTTCTTACCAGNNSCAAACCAACTCTCCTAGGCGTGCCCGGTCCGTAGC CAGTCAAAGCATAATTGCGTACACCATGAG  |                                                                           |
| S_DMS5   | TTCGTCTCTTGCTTCTTACCAGACCCNNSACCAACTCTCCTAGGCGTGCCCGGTCCGTAGC CAGTCAAAGCATAATTGCGTACACCATGAG |                                                                           |
| S_DMS6   | TTCGTCTCTTGCTTCTTACCAGACCCAAANNSAACTCTCCTAGGCGTGCCCGGTCCGTAGC CAGTCAAAGCATAATTGCGTACACCATGAG |                                                                           |
| S_DMS7   | TTCGTCTCTTGCTTCTTACCAGACCCAAACNNSTCTCCTAGGCGTGCCCGGTCCGTAGC CAGTCAAAGCATAATTGCGTACACCATGAG   |                                                                           |
| S_DMS8   | TTCGTCTCTTGCTTCTTACCAGACCCAAACNNSCCTAGGCGTGCCCGGTCCGTAG CCAGTCAAAGCATAATTGCGTACACCATGAG      |                                                                           |
| S_DMS9   | TTCGTCTCTTGCTTCTTACCAGACCCAAACCAACTCTNNSAGGCGTGCCCGGTCCGTAGC CAGTCAAAGCATAATTGCGTACACCATGAG  |                                                                           |
| S_DMS10  | TTCGTCTCTTGCTTCTTACCAGACCCAAACCAACTCTCCTNNSCGTGCCCGGTCCGTAGC CAGTCAAAGCATAATTGCGTACACCATGAG  |                                                                           |
| S_DMS11  | TTCGTCTCTTGCTTCTTACCAGACCCAAACCAACTCTCCTAGGNNSGCCCGGTCCGTAGC CAGTCAAAGCATAATTGCGTACACCATGAG  |                                                                           |
| S_DMS12  | TTCGTCTCTTGCTTCTTACCAGACCCAAACCAACTCTCCTAGGCGTNNSCGGTCCGTAGC CAGTCAAAGCATAATTGCGTACACCATGAG  |                                                                           |
| S_DMS13  | TTCGTCTCTTGCTTCTTACCAGACCCAAACCAACTCTCCTAGGCGTGCCNNSTCCGTAGC CAGTCAAAGCATAATTGCGTACACCATGAG  |                                                                           |
| S_DMS14  | TTCGTCTCTTGCTTCTTACCAGACCCAAACCAACTCTCCTAGGCGTGCCCGGNNSGTAGC CAGTCAAAGCATAATTGCGTACACCATGAG  |                                                                           |
| S_DMS15  | TTCGTCTCTTGCTTCTTACCAGACCCAAACCAACTCTCCTAGGCGTGCCCGGTCCNNSGC CAGTCAAAGCATAATTGCGTACACCATGAG  |                                                                           |
| S_DMS16  | TTCGTCTCTTGCTTCTTACCAGACCCAAACCAACTCTCCTAGGCGTGCCCGGTCCGTANN SAGTCAAAGCATAATTGCGTACACCATGAG  |                                                                           |
| S_DMS17  | TTCGTCTCTTGCTTCTTACCAGACCCAAACCAACTCTCCTAGGCGTGCCCGGTCCGTAGC CNNSCAAAGCATAATTGCGTACACCATGAG  |                                                                           |
| S_DMS18  | TTCGTCTCTTGCTTCTTACCAGACCCAAACCAACTCTCCTAGGCGTGCCCGGTCCGTAGC CAGTNNNSAGCATAATTGCGTACACCATGAG |                                                                           |
| S_DMS19  | TTCGTCTCTTGCTTCTTACCAGACCCAAACCAACTCTCCTAGGCGTGCCCGGTCCGTAGC CAGTCAANNSATAATTGCGTACACCATGAG  |                                                                           |
| S_DMS20  | TTCGTCTCTTAAASNNTTGGGCGCATATCAGATCCCGCGCCGCGATGTCGCCCAAACAAT CACCGTATTGTTAATAAAGCCAGCATCGG   | FPPR_NNS primer                                                           |
| S_DMS21  | TTCGTCTCTTAAATTTTNNNGGCGCATATCAGATCCCGCGCCGCGATGTCGCCCAAACAAT CACCGTATTGTTAATAAAGCCAGCATCGG  |                                                                           |
| S_DMS22  | TTCGTCTCTTAAATTTTGSNNGCATATCAGATCCCGCGCCGCGATGTCGCCCAAACAAT CACCGTATTGTTAATAAAGCCAGCATCGG    |                                                                           |
| S_DMS23  | TTCGTCTCTTAAATTTTGGGCSNNTATCAGATCCCGCGCCGCGATGTCGCCCAAACAAT CACCGTATTGTTAATAAAGCCAGCATCGG    |                                                                           |
| S_DMS24  | TTCGTCTCTTAAATTTTGGGCGCASNNCAGATCCCGCGCCGCGATGTCGCCCAAACAAT CACCGTATTGTTAATAAAGCCAGCATCGG    |                                                                           |
| S_DMS25  | TTCGTCTCTTAAATTTTGGGCGCATATSNNATCCCGCGCCGCGATGTCGCCCAAACAAT CACCGTATTGTTAATAAAGCCAGCATCGG    |                                                                           |
| S_DMS26  | TTCGTCTCTTAAATTTTGGGCGCATATCAGSNCCGCGCCGCGATGTCGCCCAAACAAT CACCGTATTGTTAATAAAGCCAGCATCGG     |                                                                           |
| S_DMS27  | TTCGTCTCTTAAATTTTGGGCGCATATCAGATCSNNGCCGCGATGTCGCCCAAACAAT CACCGTATTGTTAATAAAGCCAGCATCGG     |                                                                           |
| S_DMS28  | TTCGTCTCTTAAATTTTGGGCGCATATCAGATCCCGSNNGCGATGTCGCCCAAACAAT CACCGTATTGTTAATAAAGCCAGCATCGG     |                                                                           |
| S_DMS29  | TTCGTCTCTTAAATTTTGGGCGCATATCAGATCCCGCGCSNNGATGTCGCCCAAACAAT CACCGTATTGTTAATAAAGCCAGCATCGG    |                                                                           |
| S_DMS30  | TTCGTCTCTTAAATTTTGGGCGCATATCAGATCCCGCGCCGCSNNGTCCGCCCAAACAAT CACCGTATTGTTAATAAAGCCAGCATCGG   |                                                                           |
| S_DMS31  | TTCGTCTCTTAAATTTTGGGCGCATATCAGATCCCGCGCCGCGATSNNGCCCAAACAAT CACCGTATTGTTAATAAAGCCAGCATCGG    |                                                                           |
| S_DMS32  | TTCGTCTCTTAAATTTTGGGCGCATATCAGATCCCGCGCCGCGATGTCSNNCAAACAAT CACCGTATTGTTAATAAAGCCAGCATCGG    |                                                                           |
| S_DMS33  | TTCGTCTCTTAAATTTTGGGCGCATATCAGATCCCGCGCCGCGATGTCGCCSNNACAAT CACCGTATTGTTAATAAAGCCAGCATCGG    |                                                                           |
| S_DMS34  | TTCGTCTCTTAAATTTTGGGCGCATATCAGATCCCGCGCCGCGATGTCGCCAAASNAT CACCGTATTGTTAATAAAGCCAGCATCGG     |                                                                           |



|                           |                                                                                                 |                                                                                |
|---------------------------|-------------------------------------------------------------------------------------------------|--------------------------------------------------------------------------------|
| S_DMS35                   | TTCGTCTCTTAAATTTTTGGGCGCATATCAGATCCC GCGCCGCGATGTCGCCCAAACASN<br>NACCGTATTGTTAATAAAGCCAGCATCGG  |                                                                                |
| S_DMS36                   | TTCGTCTCTTAAATTTTTGGGCGCATATCAGATCCC GCGCCGCGATGTCGCCCAAACAAT<br>CSNNGTATTGTTAATAAAGCCAGCATCGG  |                                                                                |
| S_DMS37                   | TTCGTCTCTTAAATTTTTGGGCGCATATCAGATCCC GCGCCGCGATGTCGCCCAAACAAT<br>CACCSNNTTGTTAATAAAGCCAGCATCGG  |                                                                                |
| S_DMS38                   | TTCGTCTCTTAAATTTTTGGGCGCATATCAGATCCC GCGCCGCGATGTCGCCCAAACAAT<br>CACCGTASNNTTAAATAAAGCCAGCATCGG |                                                                                |
| C508f                     | CACGACGCTCTCCGATCTCATGTGAACAATTCATACGAATGTG                                                     | 1st step PCR primers for<br>amplification of the Furin<br>DMS library          |
| C509r                     | CAGACGTGTGCTCTTCCGATCTATTTGTTGGGATGGCAATGGAG                                                    |                                                                                |
| C512f                     | CACGACGCTCTTCCGATCTCGGACCCAGTAAACCCTC                                                           |                                                                                |
| C513r                     | CAGACGTGTGCTCTTCCGATCTCCGAATGTCATCCAGACGTT                                                      | 1st step PCR primers for<br>amplification of the FPPR<br>DMS library           |
| S_K854H                   | TTCGTCTCTTAAAGTGTGGGCGCATATCAGATCCC GCGCCGCGATGTCGCCCAAACAAT<br>CACCGTATTGTTAATAAAGCCAGCATCGG   |                                                                                |
| S_A846W                   | TTCGTCTCTTAAATTTTTGGGCGCATATCAGATCCC GCGCACGCGATGTCGCCCAAACAAT<br>CACCGTATTGTTAATAAAGCCAGCATCGG |                                                                                |
| S_K854C                   | TTCGTCTCTTAAAGCATTGGGCGCATATCAGATCCC GCGCCGCGATGTCGCCCAAACAAT<br>CACCGTATTGTTAATAAAGCCAGCATCGG  |                                                                                |
| S_A852M                   | TTCGTCTCTTAAATTTTTGCATGCATATCAGATCCC GCGCCGCGATGTCGCCCAAACAAT<br>CACCGTATTGTTAATAAAGCCAGCATCGG  |                                                                                |
| S_K854L                   | TTCGTCTCTTAAACAGTTGGGCGCATATCAGATCCC GCGCCGCGATGTCGCCCAAACAAT<br>CACCGTATTGTTAATAAAGCCAGCATCGG  |                                                                                |
| S_Q853V                   | TTCGTCTCTTAAATTTACGGCGCATATCAGATCCC GCGCCGCGATGTCGCCCAAACAAT<br>CACCGTATTGTTAATAAAGCCAGCATCGG   |                                                                                |
| S_K854N                   | TTCGTCTCTTAAAGTTTTGGGCGCATATCAGATCCC GCGCCGCGATGTCGCCCAAACAAT<br>CACCGTATTGTTAATAAAGCCAGCATCGG  |                                                                                |
| S_D843M                   | TTCGTCTCTTAAATTTTTGGGCGCATATCAGATCCC GCGCCGCGATGTCGCCCAAACAAT<br>CACCGTATTGTTAATAAAGCCAGCATCGG  |                                                                                |
| S_G838Y                   | TTCGTCTCTTAAATTTTTGGGCGCATATCAGATCCC GCGCCGCGATGTCGCCCAAACAAT<br>CGTAGTATTGTTAATAAAGCCAGCATCGG  |                                                                                |
| S_Y837F                   | TTCGTCTCTTAAATTTTTGGGCGCATATCAGATCCC GCGCCGCGATGTCGCCCAAACAAT<br>CACCGAATTGTTAATAAAGCCAGCATCGG  |                                                                                |
| S_K854W                   | TTCGTCTCTTAAACCATTGGGCGCATATCAGATCCC GCGCCGCGATGTCGCCCAAACAAT<br>CACCGTATTGTTAATAAAGCCAGCATCGG  |                                                                                |
| S_C840S                   | TTCGTCTCTTAAATTTTTGGGCGCATATCAGATCCC GCGCCGCGATGTCGCCCAAAGCTAT<br>CACCGTATTGTTAATAAAGCCAGCATCGG |                                                                                |
| S_D848N                   | TTCGTCTCTTAAATTTTTGGGCGCATATCAGTTCC GCGCCGCGATGTCGCCCAAACAAT<br>CACCGTATTGTTAATAAAGCCAGCATCGG   |                                                                                |
| S_C851S                   | TTCGTCTCTTAAATTTTTGGGCGCTTATCAGATCCC GCGCCGCGATGTCGCCCAAACAAT<br>CACCGTATTGTTAATAAAGCCAGCATCGG  |                                                                                |
| S_P681Y                   | TTCGTCTCTTGCTTCTTACCAGACCCAAACCAACTCTTACAGGCGTGCCCGTCCGTAGC<br>CAGTCAAAGCATAATTGCGTACACCATGAG   |                                                                                |
| S_R683H                   | TTCGTCTCTTGCTTCTTACCAGACCCAAACCAACTCTCCTAGGCACGCCCGTCCGTAGC<br>CAGTCAAAGCATAATTGCGTACACCATGAG   |                                                                                |
| S_A684H                   | TTCGTCTCTTGCTTCTTACCAGACCCAAACCAACTCTCCTAGGCACGCCCGTCCGTAGC<br>CAGTCAAAGCATAATTGCGTACACCATGAG   |                                                                                |
| S_R685F                   | TTCGTCTCTTGCTTCTTACCAGACCCAAACCAACTCTCCTAGGCGTGCCCTTCCGTAGC<br>CAGTCAAAGCATAATTGCGTACACCATGAG   |                                                                                |
| S_V687I                   | TTCGTCTCTTGCTTCTTACCAGACCCAAACCAACTCTCCTAGGCGTGCCCGTCCATCGC<br>CAGTCAAAGCATAATTGCGTACACCATGAG   |                                                                                |
| S_A688T                   | TTCGTCTCTTGCTTCTTACCAGACCCAAACCAACTCTCCTAGGCGTGCCCGTCCGTAAC<br>CAGTCAAAGCATAATTGCGTACACCATGAG   |                                                                                |
| O_K854H                   | TTCGTCTCTTGAAGTGTGAGCACAGATAAAGTTCGC                                                            |                                                                                |
| O_A846W                   | TTCGTCTCTTGAATTTTTGAGCACAGATAAGGTGCGGCCACGCAATGTCTCCCAAACAAT<br>C                               |                                                                                |
| O_C840S                   | TTCGTCTCTTGAATTTTTGAGCACAGATAAGGTGCGGGCCGCAATGTCTCCCAAGCTAT<br>CCCCTACTGCTTAATGAAAC             |                                                                                |
| O_D848N                   | TTCGTCTCTTGAATTTTTGAGCACAGATAAGGTGCGGGCCGCAATGTCT                                               |                                                                                |
| O_C851S                   | TTCGTCTCTTGAATTTTTGAGCGCTGATAAGGTGCGGGGCCG                                                      |                                                                                |
| BW588                     | GTCTTCTCGCTACCTGGTACG                                                                           | qRT-PCR primer for CHC,<br>RdRp, GAPDH(human),<br>and $\beta$ -actin (hamster) |
| BW589                     | GGTCTGAGTCTCAGACAAAGC                                                                           |                                                                                |
| RdRp-F                    | CGCATACAGTCTTRCAGGCT                                                                            |                                                                                |
| RdRp-R                    | GTGTGATGTTGAWATGACATGGTC                                                                        |                                                                                |
| probe                     | FAM-TTAAGATGTGGTGCCTTGCATACGTAGAC-IABkFQ                                                        |                                                                                |
| GAPDH-F                   | ATTCCACCCATGGCAAATTC                                                                            |                                                                                |
| GAPDH-R                   | CGCTCCTGGAAGATGGTGAT                                                                            |                                                                                |
| $\beta$ -actin-F(hamster) | ACGGCCAGGTCATCACTATTG                                                                           |                                                                                |

|                               |                       |  |
|-------------------------------|-----------------------|--|
| $\beta$ -actin-<br>R(hamster) | CAAGAAGGAAGGCTGGAAAAG |  |
|-------------------------------|-----------------------|--|
